# Supplementary material for: Fluorescent-magnetic nanocrystals: synthesis and property of YPxV1−xO4:Eu@GdPO4 core/shell structure
Source: Royal Society of Chemistry journal article supplement (doi:10.1039/c0nr01006e), 2011-01-01
Supplement: c0nr01006e.pdf [file c0nr01006e.pdf]

*Electronic Supplementary Information for*

**Fluorescent-magnetic nanocrystals: synthesis and property of  
Y<sub>P<sub>x</sub></sub>V<sub>1-x</sub>O<sub>4</sub>:Eu@GdPO<sub>4</sub> core/shell structure**

Jia-Cai Zhou, Ling-Dong Sun\*, Jie Shen, Jian-Qin Gu and Chun-Hua Yan\*

Beijing National Laboratory for Molecular Sciences, State Key Laboratory of Rare Earth Materials Chemistry and Applications, PKU-HKU Joint Laboratory on Rare Earth Materials and Bioinorganic Chemistry, Peking University, Beijing 100871, China.

E-mail: yan@pku.edu.cn, sun@pku.edu.cn

**Determination of photoluminescence quantum yield.**<sup>S1,S2</sup> Steady-state room-temperature UV absorption spectra were recorded on a Hitachi U-3010 UV-vis spectrophotometer with the same instrument parameters at a scan speed of 60 nm/min. Steady-state room-temperature photoluminescence (PL) spectra were recorded on a Hitachi F-4500 spectrophotometer equipped with a 150 W Xenon lamp under the same instrument parameters (5.0 nm for excitation split, 2.5 nm for emission split and 700 V for PMT voltage, 60 nm/min for scan speed, using 355 nm filter). The PL quantum yield (QY) of as-prepared samples was determined using Rhodamine 6G as the reference fluorescent dye. All the samples and Rhodamine 6G were dispersed in H<sub>2</sub>O and the concentrations of these solutions were at a certain range to keep their UV absorbance at the excitation wavelength less than 0.1, to avoid self-absorption effect. Briefly, the absorption and fluorescence spectra (excitation wavelength: 260 nm) of water solutions of Rhodamine 6G at different concentrations were recorded. Then use the UV absorbance at the 260 nm as abscissas and the fluorescence area integrated from 570 to 720 nm as ordinates (Figure S1). These series of points were linear-fitted and the fit straight line should have intercept zero (in this work, about 2% of the slope) and the slope  $S_{dye}$ . And one-point method was used to estimate the QY of the as-prepared samples. That is, we get a photoluminescence area  $F_{RE}$  and UV absorbance  $A_{RE}$  of the sample, and the PL QY was calculated using the following equation:

$$QY_{RE} = \frac{F_{RE}}{A_{RE}} \cdot \frac{1}{S_{dye}} \quad (S1)$$

where  $QY_{RE}$  is the QY of as-prepared samples. In equation (S1), it is hypothesized that the QY of Rhodamine 6G at excitation wavelength 260 nm is 100%.

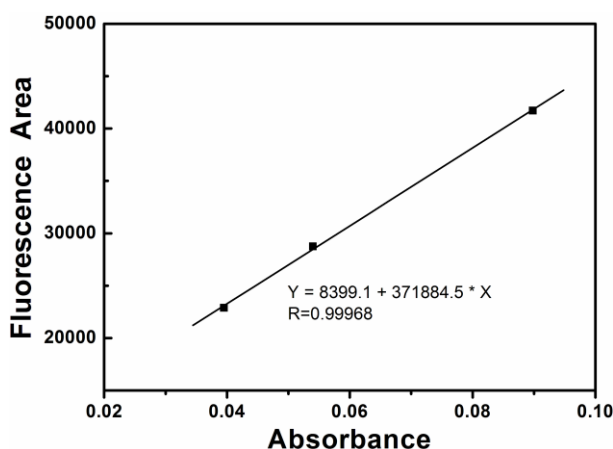

**Figure S1.** Linear fit of fluorescence area versus UV absorbance of Rhodamine 6G.

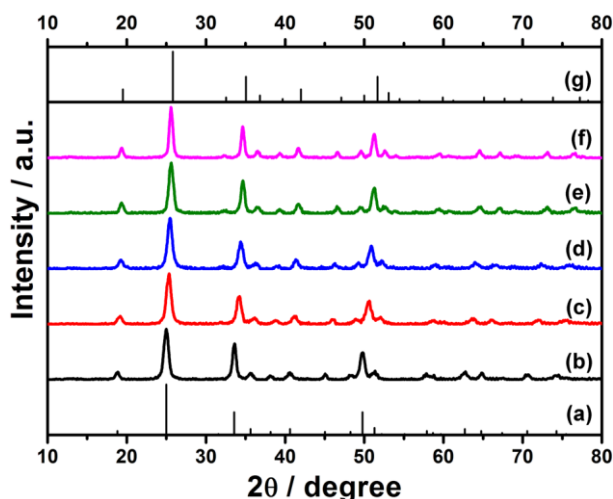

**Figure S2.** XRD patterns of  $YP_xV_{1-x}O_4:Eu$  NPs with different P/V molar ratios: 0 (b); 0.5 (c); 1.0 (d); 1.5 (e); 2.0 (f). All the P/V molar ratios are feed ratios. The lines indicate the patterns of bulk  $YVO_4$  with tetragonal phase (JCPDS no.: 17-0341) (a) and bulk  $YPO_4$  with tetragonal phase (JCPDS no.: 11-0254) (g).

**Table S1.** Particle diameter of as-prepared samples determined by the XRD and DLS data.

| Sample                       | $D_{XRD}$ / nm* | $D_{DLS}$ / nm**      |
|------------------------------|-----------------|-----------------------|
| $YP_xV_{1-x}O_4:Eu$          | 14.5            | 28.1                  |
| <b>Y@Gd1</b>                 | 16.8            | --                    |
| <b>Y@Gd2</b>                 | 17.3            | --                    |
| <b>Y@Gd3</b>                 | 17.5            | 31.3 (94%), 96.4 (6%) |
| <b>Y@Gd2@SiO<sub>2</sub></b> | --              | 51.2 (87%), 165 (13%) |

\*:  $D_{XRD}$  represents particle diameter calculated through the Scherrer formula.

\*\* :  $D_{DLS}$  represents particle diameter determined by the peaks of the size distribution curve. In the bracket shows the weight of peaks.

**Table S2.** The element molar ratio Gd/(Y+Eu) of as-prepared samples calculated by the ICP-AES and XPS data.

| Sample       | Nominal ratio | ICP-AES | XPS  |
|--------------|---------------|---------|------|
| <b>Y@Gd2</b> | 0.3           | 0.46    | 0.92 |
| <b>Y@Gd3</b> | 0.5           | 0.64    | 2.2  |

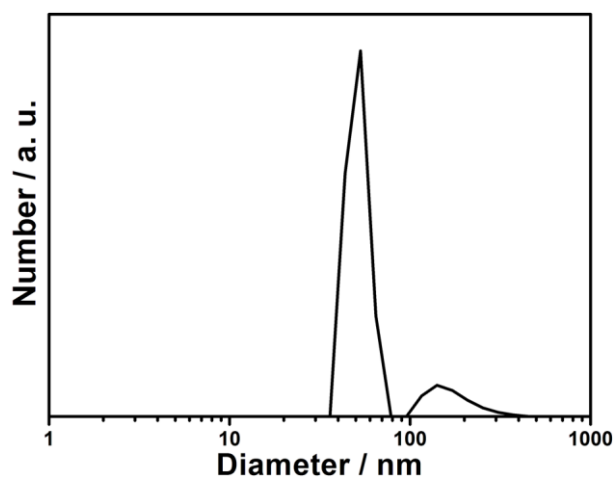

**Figure S3.** Typical DLS curve of size distribution of the sample **Y@Gd2@SiO<sub>2</sub>**.

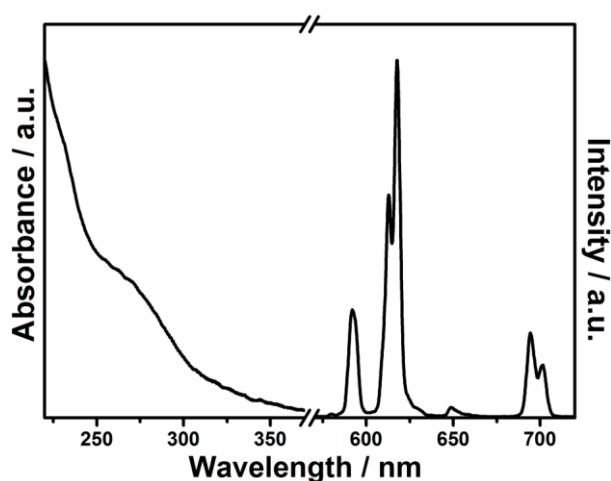

**Figure S4.** Steady-state room-temperature UV absorption spectra (left) and emission spectra (right) of the sample **Y@Gd2@SiO<sub>2</sub>**. The sample was re-dispersed in water and excited at 260 nm, where locates the absorption peak.

## References

- S1 J. R. Lakowicz, *Principles of Fluorescence Spectroscopy*; Plenum: New York, 2006.
- S2 S. Deka, A. Quarta, M. G. Lupo, A. Falqui, S. Boninelli, C. Giannini, G. Morello, M. De Giorgi, G. Lanzani, C. Spinella, R. Cingolani, T. Pellegrino and L. Manna, *J. Am. Chem. Soc.*, 2009, **131**, 2948.
